# Supplementary material for: Ultra-robust, highly stretchable and ambient temperature rapid self-healing polyurethane/graphene elastomers enabled by multi-type hydrogen bonds
Source: Royal Society of Chemistry journal article supplement (doi:10.1039/d4ta05090h), 2024-01-01
Supplement: d4ta05090h1.pdf [file d4ta05090h1.pdf]

## Supporting Information

### Ultra-Robust, Highly Stretchable and Ambient Temperature Rapid Self-Healing Polyurethane/Graphene Elastomers Enabled by Multi-Type Hydrogen Bonds

*Xiaobo Zhu*<sup>1,2</sup>, *Yu Hao*<sup>1,2,3</sup>, *Liang-Feng Huang*<sup>1,2,3</sup>, *Haichao Zhao*<sup>1,2,\*</sup>, and *Liping Wang*<sup>1,2,\*</sup>

<sup>1</sup>Key Laboratory of Advanced Marine Materials, Ningbo Institute of Materials Technology and Engineering, Chinese Academy of Sciences, Ningbo 315201, China

<sup>2</sup>University of Chinese Academy of Sciences, Beijing 100049, China

<sup>3</sup>Research Center for Advanced Interdisciplinary Sciences, Ningbo Institute of Materials Technology and Engineering, Chinese Academy of Sciences, Ningbo 315201, China

\*E-mail: zhaohaichao@nimte.ac.cn (H. Zhao); wangliping@nimte.ac.cn (L. Wang).

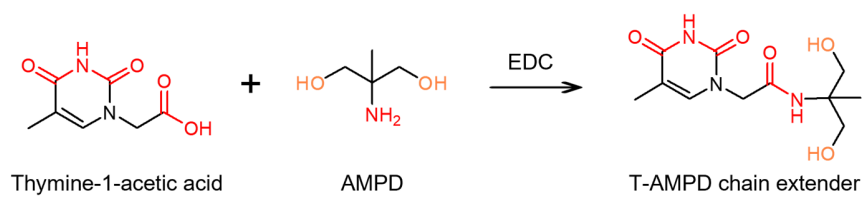

**Figure S1.** Synthesis route of T-AMPD chain extender.

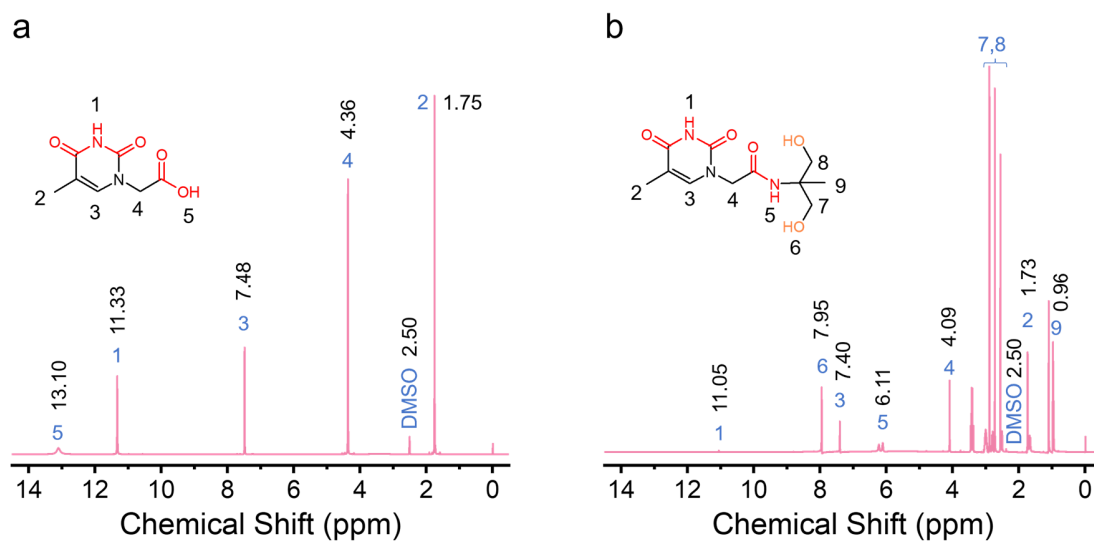

**Figure S2.**  $^1\text{H}$  NMR spectra (400 MHz, DMSO): (a) Thymine-1-acetic acid and (b) T-AMPD chain extender.

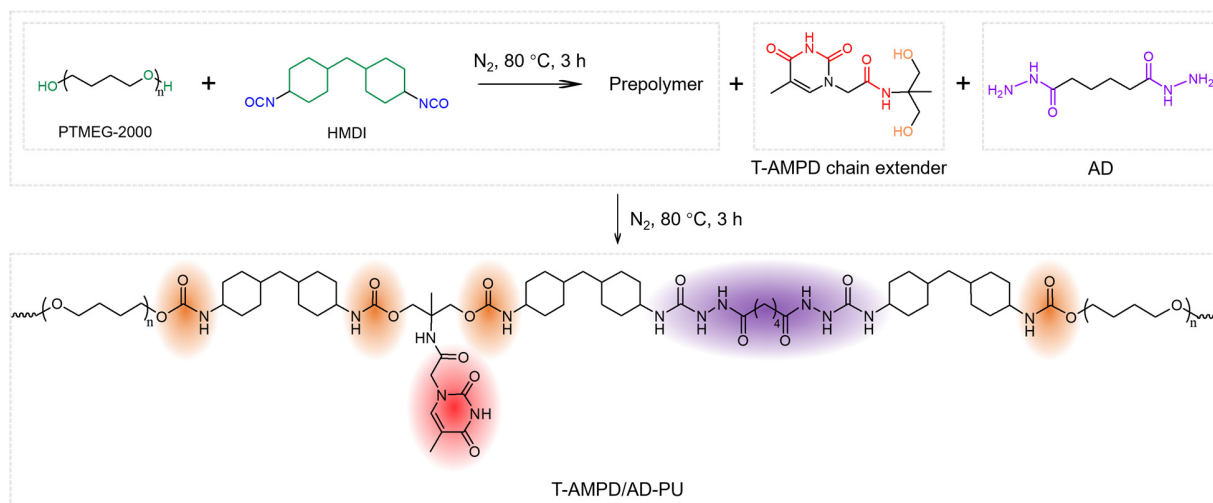

**Figure S3.** Synthesis route of T-AMPD/AD-PU.

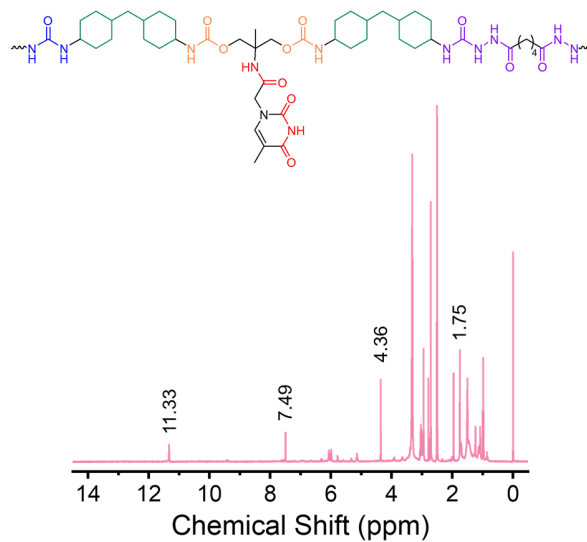

**Figure S4.**  $^1\text{H}$  NMR spectra (400 MHz, DMSO) of T-AMPD/AD-PU.

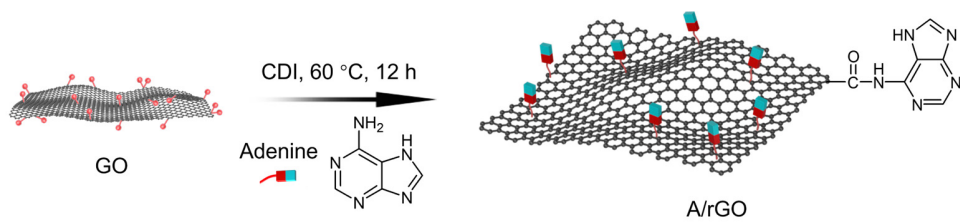

**Figure S5.** Schematic diagram of the preparation process of A/rGO nanosheets.

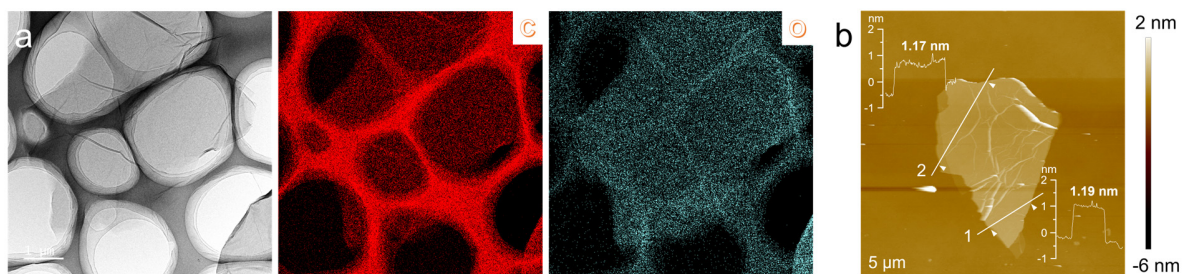

**Figure S6.** (a) TEM-EDS and (b) SPM images of GO nanosheet.

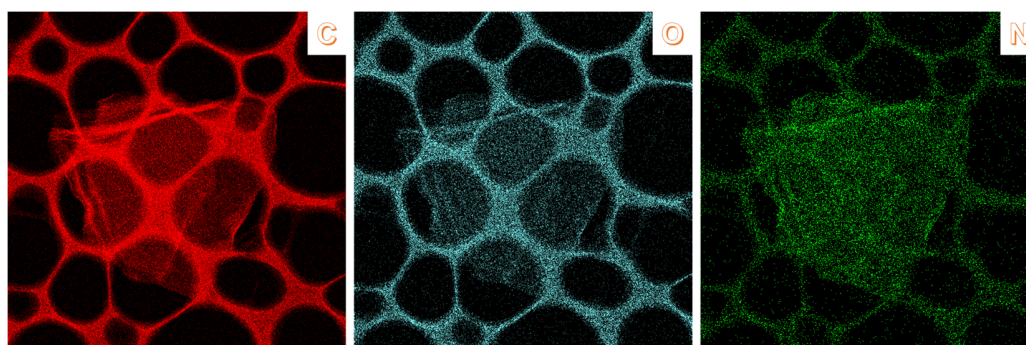

**Figure S7.** TEM-EDS images of A/rGO nanosheet.

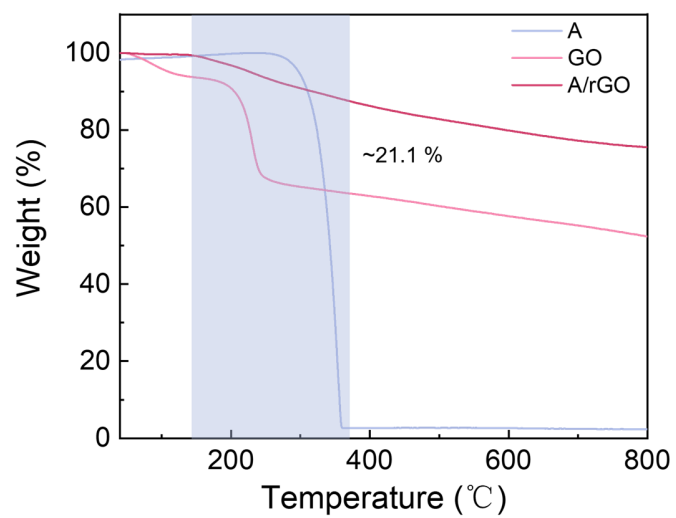

**Figure S8.** TG curves of samples.

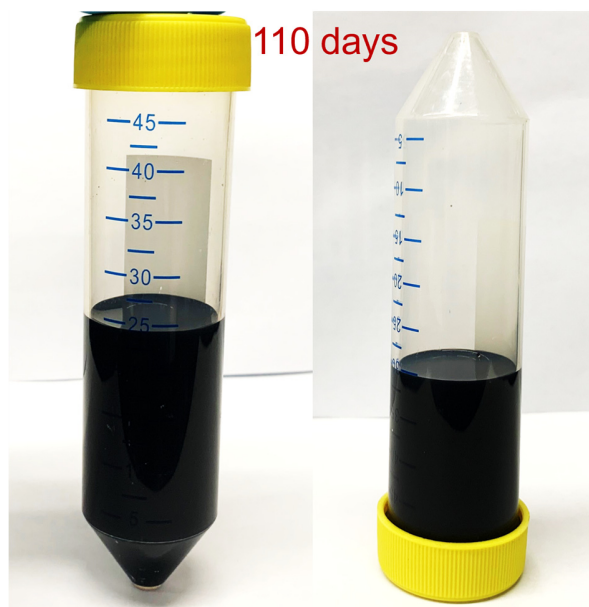

**Figure S9.** Optical photographs of A/rGO nanosheets dispersed in water for 110 days

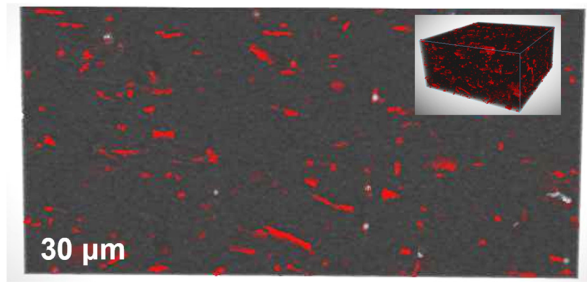

**Figure S10.** Micro-CT images of T/AGs-0.5%-PU.

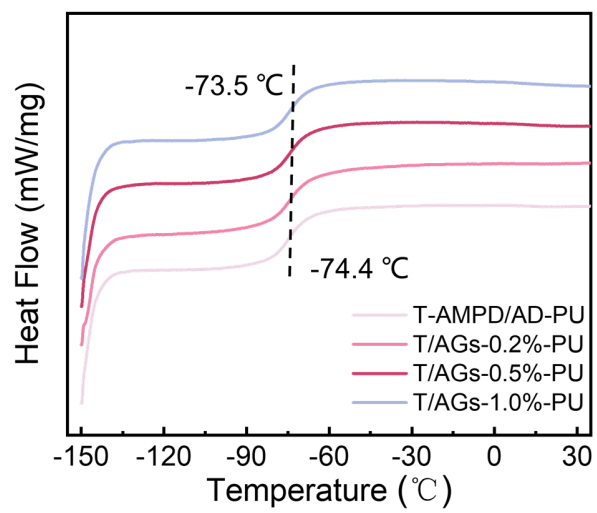

**Figure S11.** DSC curves of PU composites.

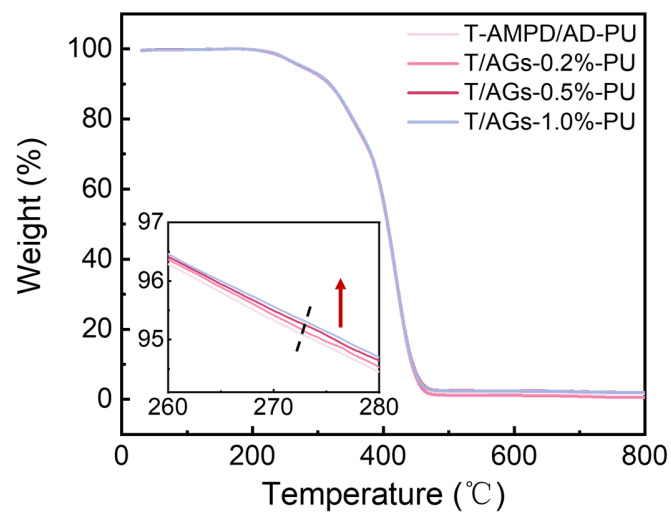

**Figure S12.** TG curves of PU composites.

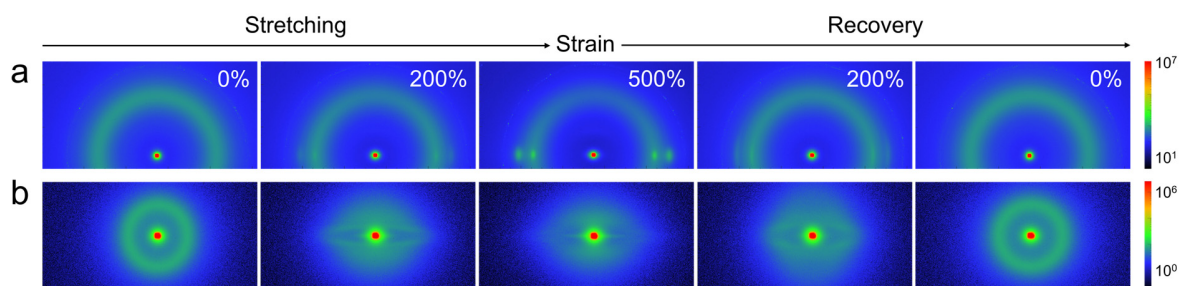

**Figure S13.** (a) 2D WAXS and (b) 2D SAXS patterns for T/AGs-0.5%-PU at different stretch-release strains.

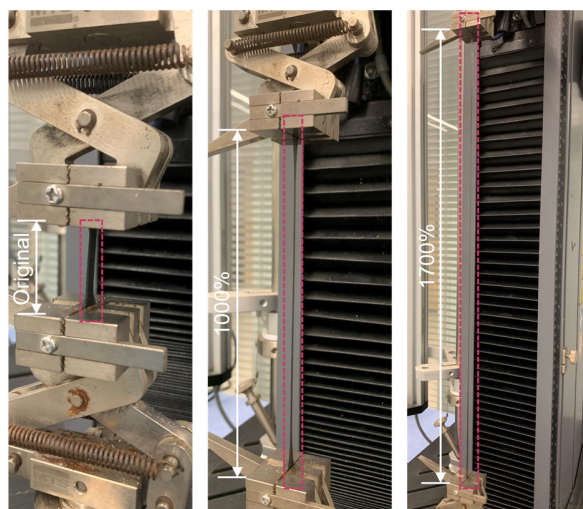

**Figure S14.** Stretch testing photographs of T/AGs-0.5%-PU.

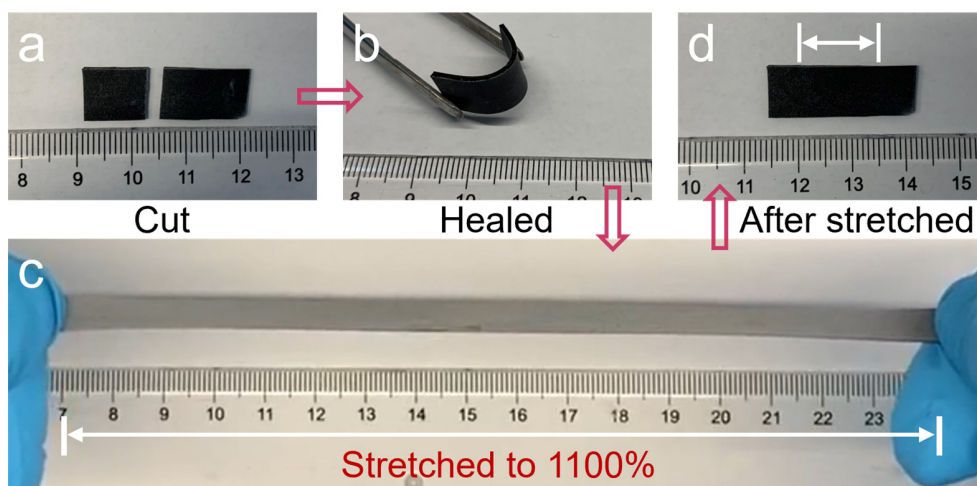

**Figure S15.** Photographs showing the detailed self-healing process of T/AGs-0.5%-PU: (a) cut, (b) healed, (c) stretched to 1100%, and (d) after stretched.



**Table S1** Comparison of ultimate tensile strength, elongation at break, toughness, and Young's modulus of PU composites.

| Samples       | Ultimate tensile strength (MPa) | Elongation at break (%) | Toughness (MJ m <sup>-3</sup> ) | Young's modulus (MPa) |
|---------------|---------------------------------|-------------------------|---------------------------------|-----------------------|
| T-AMPD/AD-PU  | 30.29 ± 2.41                    | 1631.39 ± 17.24         | 215.31 ± 28.23                  | 17.42 ± 0.72          |
| T/AGs-0.2%-PU | 36.79 ± 1.84                    | 1653.82 ± 20.13         | 245.34 ± 27.81                  | 19.82 ± 0.68          |
| T/AGs-0.5%-PU | 46.60 ± 2.15                    | 1736.89 ± 18.17         | 337.19 ± 30.64                  | 24.40 ± 1.15          |
| T/AGs-1.0%-PU | 41.89 ± 2.67                    | 1536.73 ± 19.58         | 292.59 ± 30.92                  | 25.64 ± 1.16          |

**Table S2** Comparison of ultimate tensile strength, elongation at break, self-healing efficiency, and self-healing conditions of PU composites under different self-healing times.

| Samples             | Ultimate tensile strength (MPa) | Elongation at break (%) | Self-healing efficiency (%) | Self-healing times |
|---------------------|---------------------------------|-------------------------|-----------------------------|--------------------|
| T-AMPD/AD-PU        | 26.40 ± 1.42                    | 1407.68 ± 12.14         | 87.16 ± 1.84                | RT, 2 h            |
| T/AGs-0.2%-PU       | 31.82 ± 1.67                    | 1427.84 ± 16.87         | 86.49 ± 1.31                | RT, 2 h            |
| T/AGs-0.5%-PU       | 39.90 ± 1.61                    | 1484.36 ± 17.62         | 85.62 ± 1.16                | RT, 2 h            |
| T/AGs-1.0%-PU       | 32.79 ± 1.77                    | 1203.47 ± 18.43         | 78.28 ± 1.48                | RT, 2 h            |
| T/AGs-0.5%-PU-0.5 h | 18.70 ± 1.14                    | 698.79 ± 10.83          | 40.13 ± 1.62                | RT, 0.5 h          |
| T/AGs-0.5%-PU-1 h   | 28.75 ± 0.97                    | 1069.21 ± 10.24         | 61.70 ± 1.87                | RT, 1 h            |
| T/AGs-0.5%-PU-1.5 h | 35.59 ± 1.79                    | 1322.79 ± 13.47         | 76.37 ± 1.44                | RT, 1.5 h          |

**Table S3** Comparison of the proposed T/AGs-0.5%-PU elastomer with other reported polymers with self-healing ability within 2 h at room temperature.

| Ref.      | Self-healing motif | Ultimate tensile strength (MPa) | Elongation at break (%) | Toughness (MJ m <sup>-3</sup> ) | Young's modulus (MPa) | Self-healing efficiency (%) | Function healing | Self-healing times |
|-----------|--------------------|---------------------------------|-------------------------|---------------------------------|-----------------------|-----------------------------|------------------|--------------------|
| 1         | Disulfides         | 6.8                             | 923                     | 26.9                            | 1.5                   | 88                          | Yes              | RT. 2 h            |
| 2         | Disulfides         | 0.81                            | 3100                    | 13.0                            | N/A                   | 80                          | N/A              | RT. 2 h            |
| 3         | Metal-ligand       | 10                              | 607                     | 46.1                            | N/A                   | 92                          | Yes              | RT. 5 min          |
| 4         | H-bond             | 10.3                            | 596.2                   | 37.8                            | 31.5                  | 90                          | N/A              | RT. 1 h            |
| 5         | H-bond             | 1.6                             | 1400                    | N/A                             | N/A                   | 88                          | N/A              | RT. 1.5 h          |
| 6         | H-bond             | 12.86                           | 1.26                    | N/A                             | 1560                  | 99                          | N/A              | RT. 1 h            |
| 7         | Metal-ligand       | 3.36                            | 623                     | 10.4                            | 30.7                  | 73.2                        | N/A              | RT. 2 h            |
| 8         | H-bond+ Disulfides | 0.096                           | 1320                    | N/A                             | N/A                   | 93                          | Yes              | RT. 2 h            |
| 9         | H-bond+ O-B bond   | 5.5                             | 2000                    | 30                              | N/A                   | 97.6                        | Yes              | RT. 2 h            |
| This Work | H-bond             | 46.60                           | 1736.89                 | 337.19                          | 24.40                 | 85.62                       | Yes              | RT. 2 h            |

**Table S4** Oxygen transmission rates of the PU composites.

| Samples       | Oxygen transmission rates (m <sup>3</sup> m <sup>-2</sup> d <sup>-1</sup> ) |
|---------------|-----------------------------------------------------------------------------|
| T-AMPD/AD-PU  | $8.39 \times 10^{-3} \pm 3.18 \times 10^{-3}$                               |
| T/AGs-0.2%-PU | $9.57 \times 10^{-5} \pm 2.60 \times 10^{-5}$                               |
| T/AGs-0.5%-PU | $3.45 \times 10^{-5} \pm 8.94 \times 10^{-6}$                               |
| T/AGs-1.0%-PU | $2.23 \times 10^{-5} \pm 4.27 \times 10^{-6}$                               |

## References

- [1] S. M. Kim, H. Jeon, S. H. Shin, S. A. Park, J. Jegal, S. Y. Hwang, D. X. Oh, J. Park, *Adv. Mater.* **2018**, *30*, 1705145.
- [2] A. Rekondo, R. Martin, A. R. De Luzuriaga, G. Cabañero, H. J. Grande, I. Odriozola, *Mater. Horiz.* **2014**, *1*, 237-240.
- [3] Y. Wang, Q. Guo, G. Su, J. Cao, J. Liu, X. Zhang, *Adv. Funct. Mater.* **2019**, *29*, 1906198.
- [4] X. Zhu, W. Zheng, H. Zhao, L. Wang, *J. Mater. Chem. A* **2021**, *9*, 20737-20747.
- [5] C. Liu, H. Wu, Y. Qiang, H. Zhao, L. Wang, *Corros. Sci.* **2021**, *184*, 109355.
- [6] J. H. Xu, J. Y. Chen, Y. N. Zhang, T. Liu, J. J. Fu, *Angew. Chem. Int. Edit.* **2021**, *60*, 7947-7955.
- [7] D. Mozhdghi, S. Ayala, O. R. Cromwell, Z. Guan, *J. Am. Chem. Soc.* **2014**, *136*, 16128-16131.
- [8] H. Guo, Y. Han, W. Zhao, J. Yang, L. Zhang, *Nat. Commun.* **2020**, *11*, 2037.
- [9] J. Tolvanen, M. Nelo, J. Hannu, J. Juuti, H. Jantunen, *Adv. Sci.* **2021**, *8*, 2103235.
